# Supplementary material
Source: PubMed Central journal article supplement (PMC6686764)
Supplement: jamapediatr-173-924-s002.pdf [file jamapediatr-173-924-s002.pdf]

## Supplementary Online Content

Nørrisgaard PE, Haubek D, Kühnisch J, et al. Association of high-dose vitamin D supplementation during pregnancy with the risk of enamel defects in offspring: a 6-year follow-up of a randomized clinical trial. *JAMA Pediatr*. Published online August 5, 2019. doi:10.1001/jamapediatrics.2019.2545

**eTable.** Drop-out Analyses in Relation to Baseline Characteristics of the Study Population

**eTable. Drop-out analyses in relation to baseline characteristics of the study population.**

| <b>Drop-out analysis</b>                                                   | <b>Dental examination<br/>N=496</b> | <b>Lost to follow-up<br/>N=131</b> |
|----------------------------------------------------------------------------|-------------------------------------|------------------------------------|
| <b>Mothers</b>                                                             |                                     |                                    |
| High-dose vitamin D <sub>3</sub> supplementation in N (%)                  | 244 (49.2)                          | 74 (56.5)                          |
| Mean mothers age at birth in years (sd)                                    | <b>32.4 (4.2)</b>                   | <b>31.2 (5.2)</b>                  |
| Household income during last 3 months before birth in N (%)                |                                     |                                    |
| Below 24.000 USD                                                           | 150 (30.2)                          | 37 (40.7)                          |
| 24.000-40.000 USD                                                          | 270 (54.4)                          | 45 (49.5)                          |
| Above 40.000 USD                                                           | 76 (15.3)                           | 9 (9.9)                            |
| Smoking in pregnancy in N (%)                                              | 36 ( 7.3)                           | 12 (9.2)                           |
| Mean serum vitamin D <sub>3</sub> level before intervention in nmol/L (sd) | 76.6 (25.6)                         | 74.4 (25.5)                        |
| <b>Children</b>                                                            |                                     |                                    |
| Male children in N (%)                                                     | 249 (50.2)                          | 62 (47.3)                          |
| Non-caucasian children in N (%)                                            | 24 (4.8)                            | 3 (2.3)                            |
| Day in year of birth, day 1=January 1 <sup>st</sup> (sd)                   | <b>172.0 (116.2)</b>                | <b>194.8 (114.4)</b>               |
| <b>Birth</b>                                                               |                                     |                                    |
| Termbirth >37 weeks (%)                                                    | 443 (89.3)                          | 114 (87.0)                         |
| Mean gestational age (sd)                                                  | <b>279.1 (11.8)</b>                 | <b>274.8 (18.8)</b>                |

Comparisons between the study population and the lost to follow-up were calculated by Chi-square test for categorical variables and by Student's *t*-test for continuous variables. Bold numbers indicate a statistically significant difference ( $P < 0.05$ ).
